# Supplementary material for: The Role of Pseudomonas aeruginosa ExoY in an Acute Mouse Lung Infection Model
Source: MDPI journal article supplement (doi:10.3390/toxins10050185), 2018-05-04
Supplement: s1 [file s1]

# Supplementary Materials: The role of *Pseudomonas aeruginosa* ExoY in an Acute Mouse Lung Infection Model

Christina Kloth, Bastian Schirmer, Antje Munder, Tane Stelzer, Justin Rothschuh and Roland Seifert

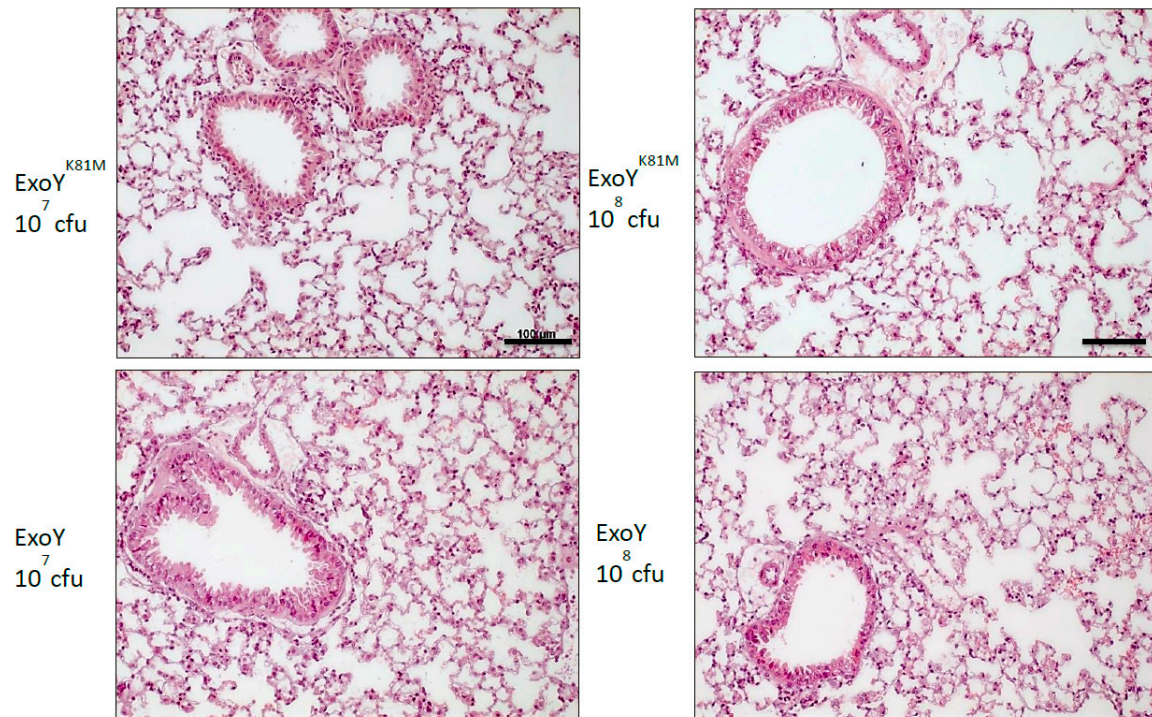

**Figure S1.** Representative micrographs of ExoY/ExoY<sup>K81M</sup>-infected mouse lungs 2 h after infection. Standard H&E staining, scale bar = 100 μm.

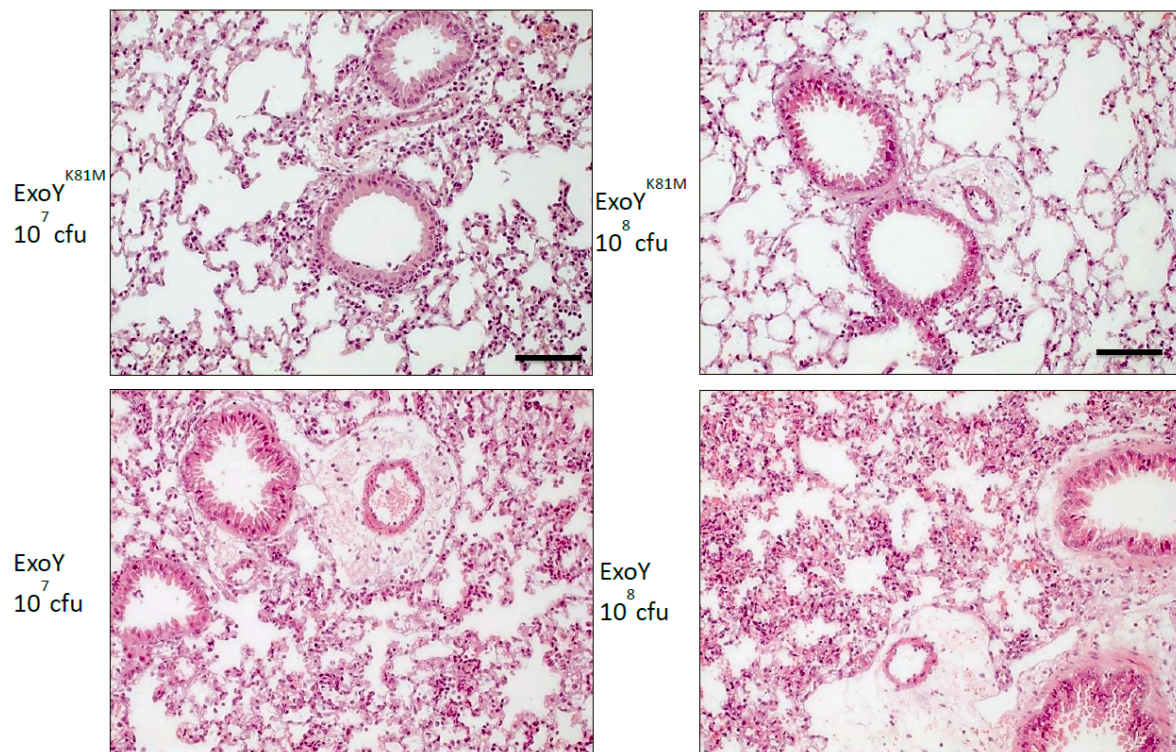

**Figure S2.** Representative micrographs of ExoY/ExoY<sup>K81M</sup>-infected mouse lungs 8 h after infection. Standard H&E staining, scale bar = 100  $\mu$ m.



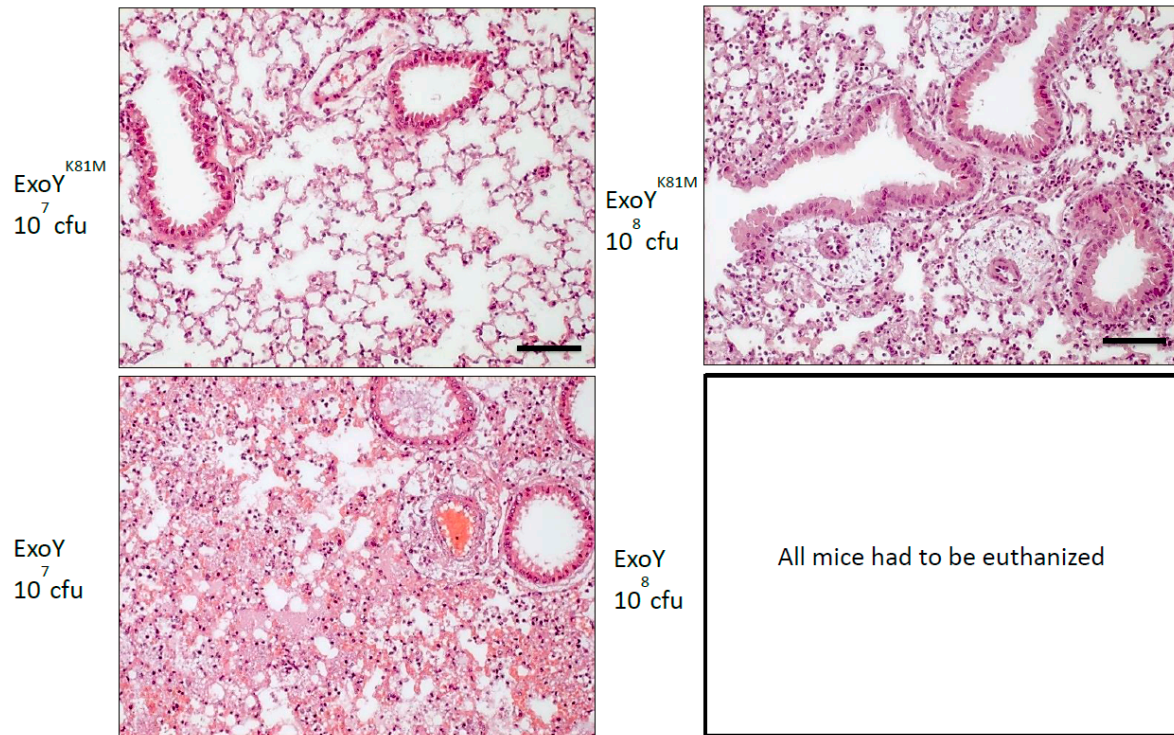

**Figure S3.** Representative micrographs of ExoY/ExoY<sup>K81M</sup>-infected mouse lungs 48 h after infection. Standard H&E staining, scale bar = 100  $\mu$ m. All mice infected with  $10^8$  cfu of ExoY had to be sacrificed because they met the pre-defined termination criteria.

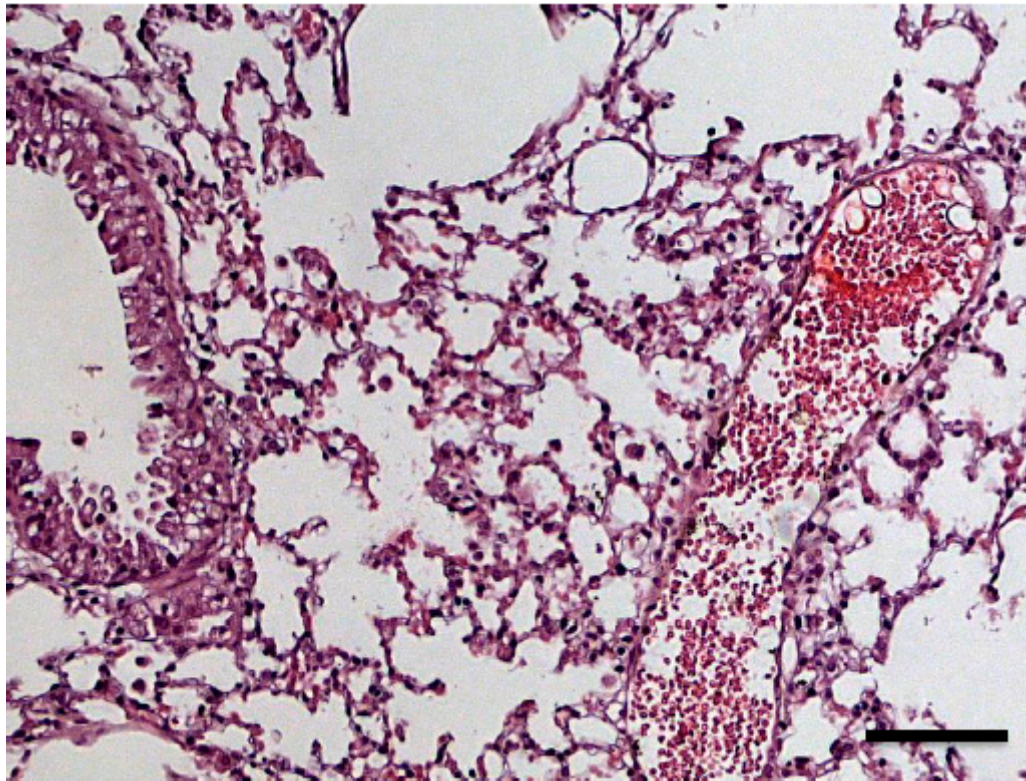

**Figure S4.** Representative micrograph of mouse lungs (PBS control) 24 h after infection. Standard H&E staining, scale bar = 100  $\mu$ m.

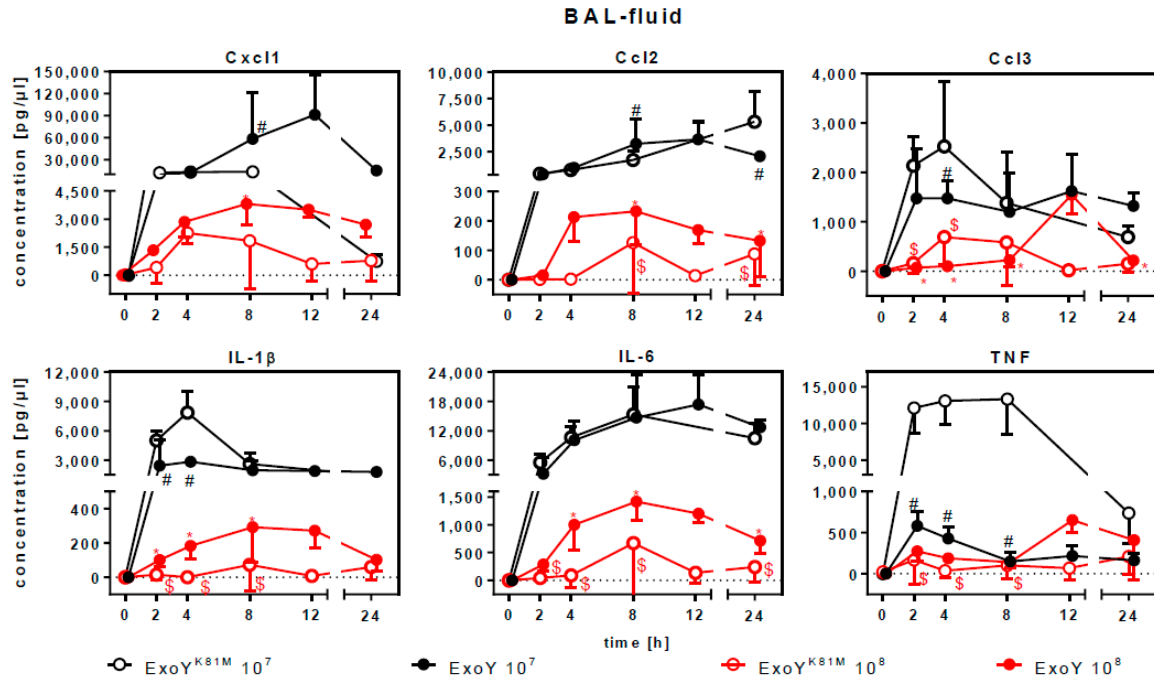

**Figure S5.** Expression of inflammatory cytokines in BAL-f of mice after infection with ExoY<sup>K81M</sup> and ExoY. The same data as presented in Fig. 3 are presented here with segmented ordinates in order to allow a better evaluation of the experimental groups infected with 108 cfu. Data represent the mean  $\pm$  SD of  $n = 6$  animals. Differences between ExoY infection doses (\*), between ExoYK81M infection doses (\$), and between ExoY and ExoYK81M of same infection dose (#) were considered significant, when  $p \leq 0.05$  (two-way-ANOVA with post-hoc Holm-Sidak correction).

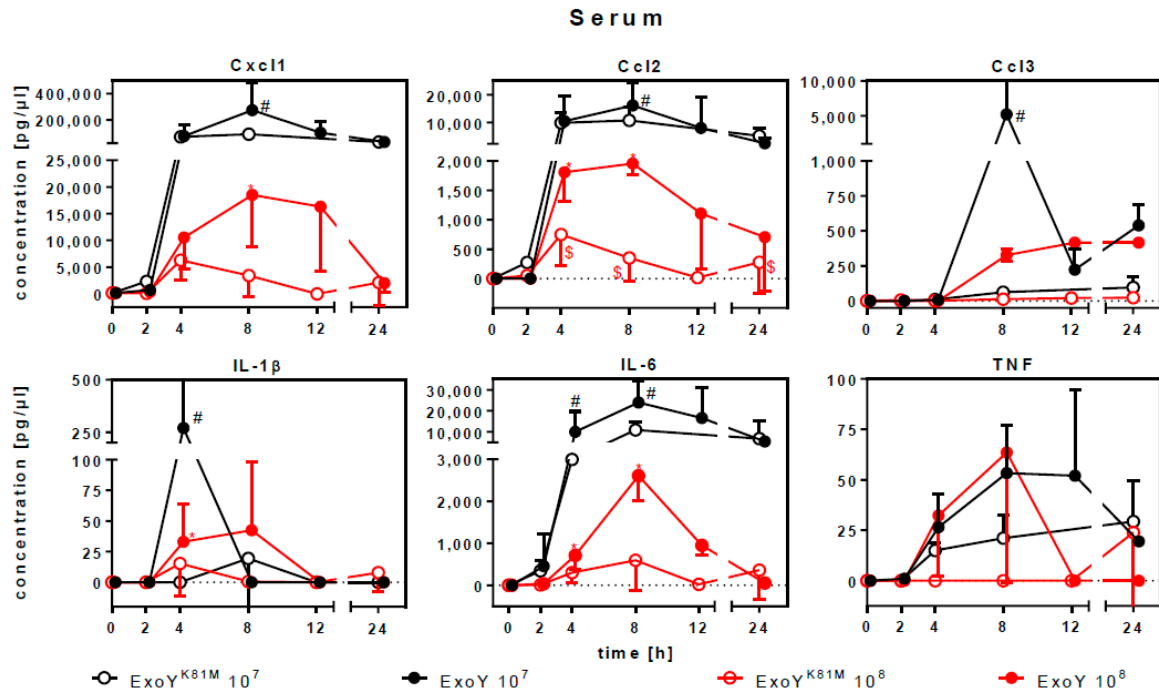

**Figure S6.** Expression of inflammatory cytokines in BAL-f of mice after infection with ExoY<sup>K81M</sup> and ExoY. The same data as presented in Fig. 4 are presented here with segmented ordinates in order to allow a better evaluation of the experimental groups infected with 10<sup>8</sup> cfu. Data represent the mean  $\pm$  SD of n = 6 animals. Differences between ExoY infection doses (\*), between ExoYK81M infection doses (\$), and between ExoY and ExoYK81M of same infection dose (#) were considered significant, when  $p \leq 0.05$  (two-way-ANOVA with post-hoc Holm-Sidak correction).
